# Supplementary material
Source: PubMed Central journal article supplement (PMC2824656)

Recurrent mutations of the STAT6 DNA binding domain in Primary Mediastinal B-cell Lymphoma. Ritz *et al*

**Supplementary Figure. Mutation in the DNA binding domain of STAT6 in L1236 Hodgkin lymphoma cell line**

Electropherograms showing partial *STAT6* cDNA sequences for L428 (upper panel, wild type sequence) and L1236 (lower panel, mutation N471Y and polymorphism D419N) Hodgkin cell lines.

# Supplementary Figure

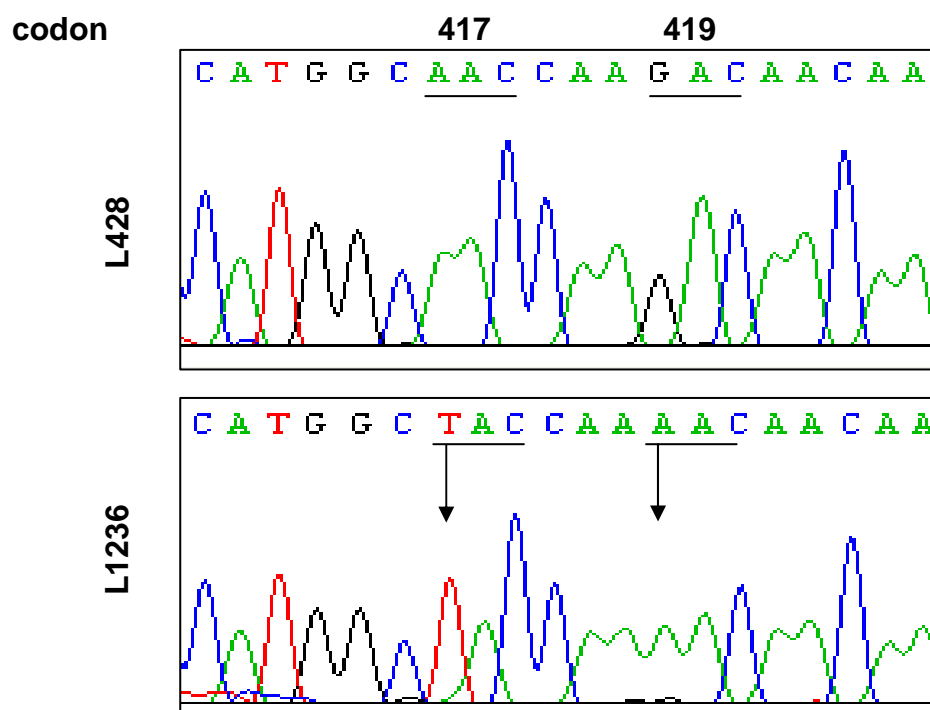

Supplement: halms411059-supplement_1.pdf [file halms411059-supplement_1.pdf]
